# Supplementary material
Source: HighWire-hosted journal article supplement (doi:10.1101/rna.079888.123)
Supplement: Supplemental_Material.pdf [file Supplemental_Material.pdf]

## Supplemental Figure 1

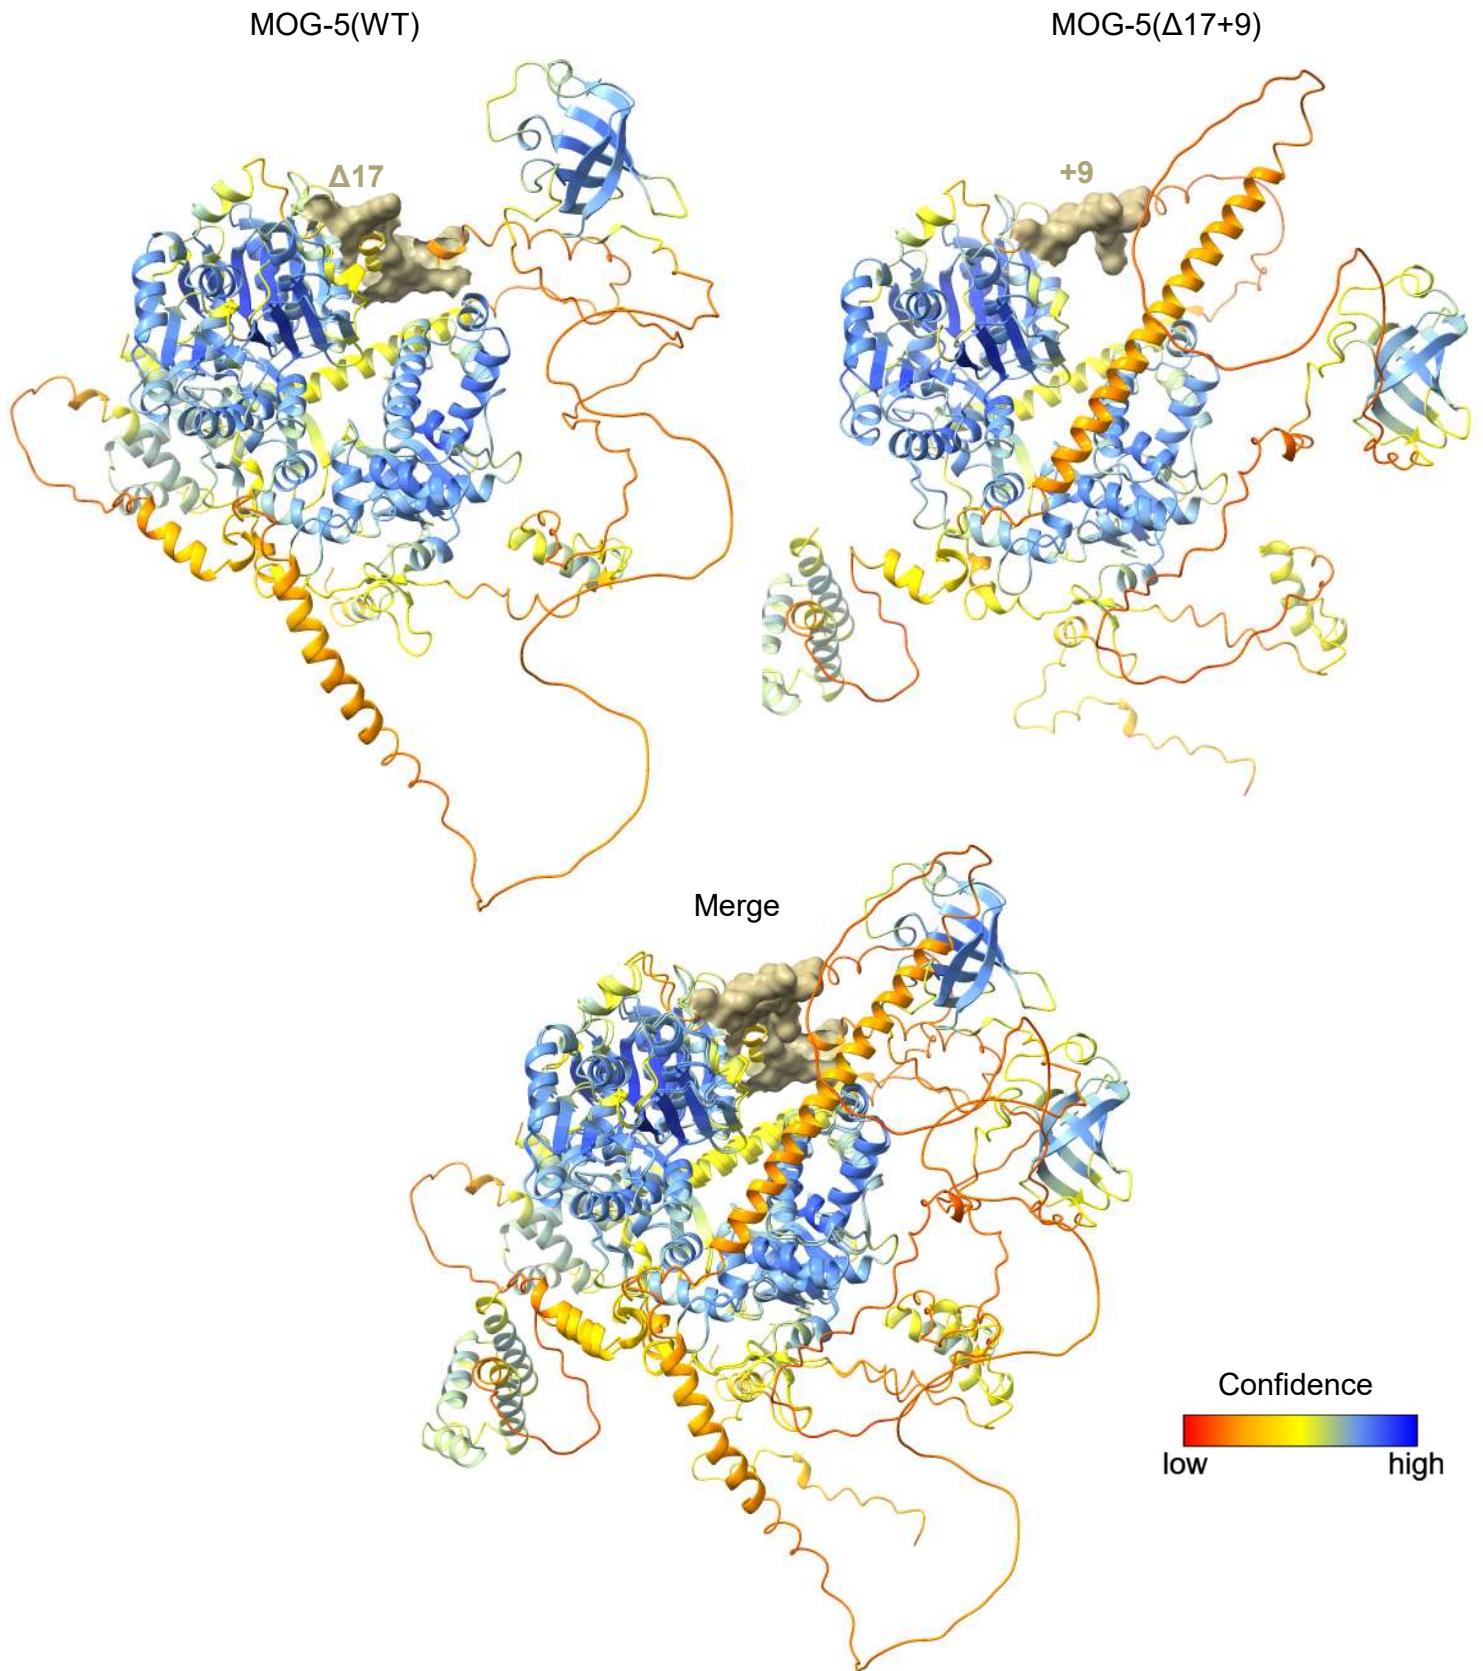

### Effects of MOG-5(Δ17+9) on AlphaFold structural predictions. MOG-5(WT)

Prediction was retrieved from <https://alphafold.ebi.ac.uk/>. MOG-5(Δ17+9) was generated by AlphaFold using ColabFold. “Δ17” highlighted in beige are the 17 amino acids which are removed, and “+9” are the 9 replacing amino acids, of MOG-5(Δ17+9). Images and Merge of the two structures was generated on ChimeraX. Amino acids colors correspond to confidence as shown in key.

## Supplemental Figure 2

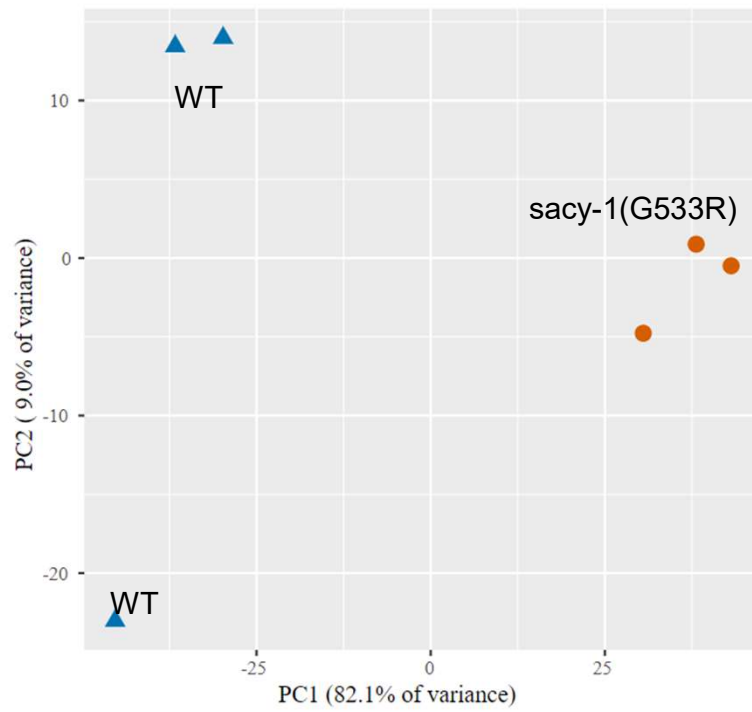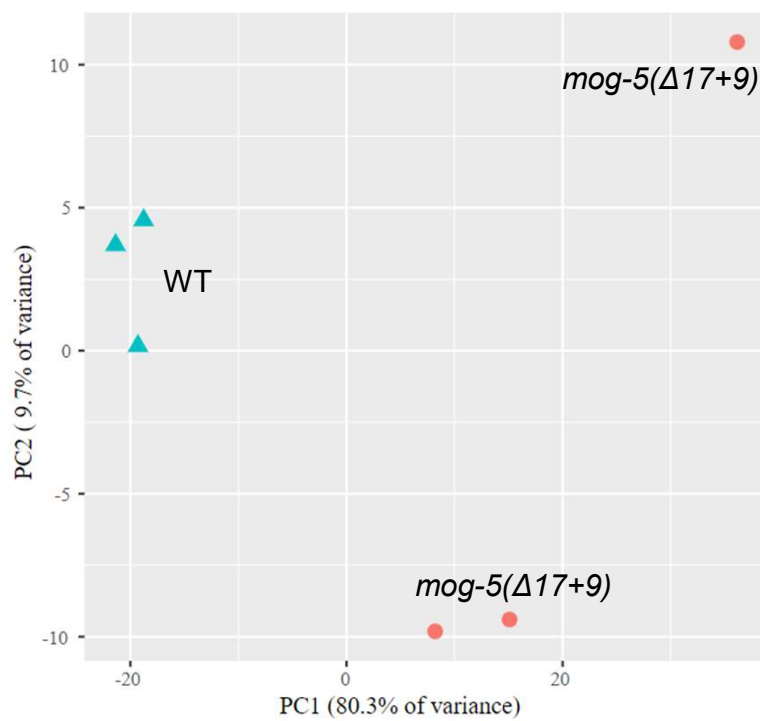

**PCA analysis of all libraries sequenced for this work.** Generated using the built-in R function "prcomp".

## Supplemental Table 1

## Table of A3 Events

Auxin Treatment, CA1200 vs. DG4703, FASTQ from (Tsukamoto *et al.* 2020)

| Gene        | Location (ce10)          | Average $\Delta$ PSI | Splice Site Interval | Proximal Splice Site | Distal Splice Site |
|-------------|--------------------------|----------------------|----------------------|----------------------|--------------------|
| R10E9.1     | chrIII:3965790-3966413   | 67.49                | 9                    | CTCAAG               | TTTCAG             |
| F33D4.2     | chrIV:7692168-7692353    | 59.48                | 9                    | ATTAAG               | TTTCAG             |
| R07H5.8     | chrIV:11210189-11210384  | 59.11                | 12                   | GTGTTG               | TTTCAG             |
| T01D1.2     | chrII:167981-168615      | 57.61                | 6                    | ATAAAG               | TTCCAG             |
| F59A6.12    | chrII:5011874-5012058    | 55.43                | 6                    | TATTAG               | TTCCAG             |
| R02F2.1     | chrIII:5504748-5505362   | 54.7                 | 6                    | CTCAAG               | TTTCAG             |
| E01G4.1     | chrII:13445113-13446386  | 51.95                | 6                    | CCAAAG               | ATTCAG             |
| F56C9.10    | chrIII:7332876-7333726   | 51.12                | 9                    | ATTGAG               | GTGAAG             |
| Y57A10A.18  | chrII:12211043-12211793  | 50.8                 | 9                    | TCCAAG               | CTTCAG             |
| C28D4.2     | chrIV:9732806-9732994    | 49.6                 | 9                    | TCAAAG               | TTCCAG             |
| H37N21.1    | chrI:7141939-7142121     | 48.29                | 9                    | TTATAG               | TTTCAG             |
| F59A6.12    | chrII:5011650-5011833    | 48.25                | 10                   | TTCGAG               | AAAAAG             |
| C06C3.1     | chrII:9362909-9363296    | 47.33                | 9                    | TGCTAG               | TTTAAG             |
| C34D10.2    | chrX:8024394-8024584     | 47.26                | 12                   | TTTCAG               | CTTCAG             |
| D2045.1     | chrIII:10467088-10467281 | 47                   | 8                    | ATGAAG               | TTGAAG             |
| F38A6.3     | chrV:20783707-20784361   | 46.25                | 6                    | TATCAG               | TTGCAG             |
| ZK418.6     | chrIII:7077444-7077627   | 45.33                | 8                    | AAATAG               | TTCTAG             |
| F46H5.7     | chrX:7240636-7240823     | 45.14                | 9                    | AATTAG               | TTTCAG             |
| Y41C4A.4    | chrIII:11685110-11688236 | 44.23                | 6                    | TCTCAG               | TTTCAG             |
| C26C6.5     | chrI:7539171-7539497     | 44.09                | 9                    | TAAAAG               | TTACAG             |
| Y119C1B.8   | chrI:4529938-4530128     | 42.42                | 6                    | ATCTAG               | CTTCAG             |
| B0001.6     | chrIV:12162327-12162858  | 41.71                | 6                    | ATTAAG               | TTTCAG             |
| B0041.2     | chrI:4656536-4657488     | 41.35                | 6                    | CAAAAG               | ATTCAG             |
| K01G5.8     | chrIII:10740426-10740673 | 40.39                | 9                    | TCCCAG               | TTCCAG             |
| C05E11.1    | chrX:4589830-4590013     | 40.05                | 12                   | TTGTAG               | TTTCAG             |
| T24A11.1    | chrIII:3799783-3800036   | 40                   | 12                   | AGTCAG               | TTCCAG             |
| C30H7.2     | chrI:5417143-5418008     | 39.92                | 9                    | CGTAAG               | TTTCAG             |
| M01F1.4     | chrIII:3507125-3507314   | 39.73                | 6                    | AAAAAG               | TTCCAG             |
| Y48C3A.5    | chrII:13281371-13282568  | 39.58                | 6                    | TTCCAG               | CTACAG             |
| Y104H12BR.1 | chrIV:1289951-1291507    | 39.58                | 9                    | TCGGAG               | TTTCAG             |
| Y57A19A.18  | chrII:12209700-12210815  | 39.34                | 9                    | GATAAG               | CTCCAG             |
| Y41C4A.4    | chrIII:11688032-11691408 | 39.09                | 9                    | CTTTAG               | TTCCAG             |
| M106.4      | chrII:10866031-10866728  | 39.07                | 6                    | GAAAAG               | CTTCAG             |
| Y57G11C.45  | chrIV:14783929-14784126  | 38.82                | 9                    | TTTTAG               | TTTCAG             |
| C27C12.4    | chrX:14854947-14855570   | 38.72                | 6                    | TTTCAG               | TTTCAG             |
| C05E4.3     | chrV:753972-754316       | 38.49                | 6                    | TAACAG               | TTTTAG             |
| F21D12.1    | chrII:7348085-7348387    | 38.38                | 6                    | TTAAAG               | TTATAG             |
| Y71G12B.12  | chrI:1710931-1712784     | 37.53                | 6                    | GCCAAG               | TTCCAG             |
| ZC376.7     | chrV:14196200-14196404   | 37.35                | 6                    | AAATAG               | TTTCAG             |
| Y97E10AR.6  | chrV:8012653-8012896     | 37.23                | 6                    | AACTAG               | TTATAG             |
| R11A5.2     | chrI:7858215-7858616     | 37.03                | 7                    | ACATAG               | TTTCAG             |
| B0379.4     | chrI:10093700-10100719   | 37.02                | 6                    | TATCAG               | TTTCAG             |

|            |                          |       |    |         |        |
|------------|--------------------------|-------|----|---------|--------|
| W08G11.3   | chrV:16370683-16370889   | 36.5  | 6  | CACAAG  | TTCCAG |
| C44E4.1    | chrI:4612027-4613674     | 36.27 | 6  | TTCTAG  | TTCCAG |
| Y61A9LA.3  | chrV:4571715-4572374     | 36.17 | 6  | AAATAG  | TTTCAG |
| F58H1.7    | chrV:11964246-11964789   | 35.99 | 6  | TCCCAG  | TTCCAG |
| Y119C1B.8  | chrI:4529070-4529939     | 35.6  | 6  | ACCCAG  | TTTCAG |
| C24F3.1    | chrIV:10219964-10220758  | 35.45 | 6  | ACCTAG  | TTTCAG |
| F40F12.7   | chrIII:9914570-9914756   | 35.24 | 9  | CACCAG  | TTTCAG |
| Y105E8A.24 | chrI:14571700-14572773   | 35.23 | 9  | TTAAAG  | TTTCAG |
| C34D10.2   | chrX:8021268-8022793     | 35.08 | 6  | AATTAG  | TTGCAG |
| Y54F10AM.4 | chrIII:2544353-2544886   | 34.9  | 6  | TTCAAG  | TTTCAG |
| F27C1.2    | chrI:5430642-5430842     | 34.6  | 12 | ACCTAG  | CTTCAG |
| K11E8.1    | chrIV:10329075-10331121  | 34.49 | 6  | TTAAAG  | ATTTAG |
| C43H6.7    | chrX:2401798-2401989     | 34.41 | 6  | ATACAG  | TTTCAG |
| K07B1.5    | chrV:9332737-9333038     | 34.33 | 6  | AAATAG  | TTTCAG |
| F54B3.1    | chrII:10265676-10266779  | 34.17 | 6  | AACTAG  | TTACAG |
| T27A3.1    | chrI:6125515-6125719     | 34.16 | 6  | TGTTAG  | TTTCAG |
| M110.5     | chrII:8227361-8227566    | 34.08 | 6  | TAAAAG  | TTCCAG |
| T04C10.2   | chrX:14817170-14817763   | 33.65 | 6  | TTATAG  | CTTCAG |
| T12A2.15   | chrIII:6225726-6226194   | 33.48 | 6  | AACTAG  | TTTCAG |
| T04D1.3    | chrI:4677660-4678641     | 33.23 | 6  | GTCCAG  | TTTAAG |
| W04D2.6    | chrV:12502145-12502617   | 32.85 | 6  | CAAAAAG | TTTCAG |
| C18E9.10   | chrII:8962583-8963887    | 32.8  | 6  | ATCAAG  | TTTCAG |
| ZK688.8    | chrIII:7915009-7915917   | 31.61 | 6  | AATAAG  | TTCCAG |
| H12C20.6   | chrV:11572037-11572220   | 31.33 | 8  | CTAAAG  | TTACAG |
| H12C20.6   | chrV:11571870-11572055   | 30.79 | 7  | TGATAG  | TTCCAG |
| C36B1.8    | chrI:8740955-8741362     | 30.32 | 9  | ATAAAG  | TTGCAG |
| T13C2.6    | chrII:6783666-6783974    | 30.3  | 6  | TGATAG  | TTTCAG |
| F39H11.2   | chrI:8701349-8701587     | 30.29 | 9  | CAAAAG  | TTGCAG |
| W06A7.3    | chrV:14829724-14830302   | 29.8  | 12 | AATGAG  | TTTCAG |
| H14E04.2   | chrIII:2376319-2376681   | 29.78 | 9  | TCCCAG  | TTTCAG |
| T12A2.8    | chrIII:6247182-6247371   | 29.46 | 9  | AAAAAG  | TTTCAG |
| R13H8.1    | chrI:10763579-10764485   | 29.12 | 6  | CGAAAG  | TTTCAG |
| Y45G5AM.1  | chrV:4188450-4188666     | 28.98 | 5  | TTATAG  | GGCCAG |
| F21D12.1   | chrII:7347418-7347600    | 28.95 | 6  | TTTCAG  | TTTCAG |
| Y113G7B.18 | chrV:20254893-20256343   | 28.91 | 9  | TTCCAG  | TTCCAG |
| T19A6.3    | chrI:8399130-8399316     | 28.31 | 6  | TCACAG  | TTTCAG |
| Y17G7B.2   | chrII:11980564-11981032  | 28.22 | 6  | AAAAAG  | TTCCAG |
| F59E12.4   | chrII:5632869-5633098    | 28.18 | 6  | TCATAG  | TTTCAG |
| C53B4.4    | chrIV:8983455-8983833    | 28    | 9  | TTTGAG  | TTTCAG |
| T01G9.2    | chrI:8287857-8288117     | 28    | 9  | CCAAAG  | TTCAAG |
| M110.5     | chrII:8227509-8228336    | 27.99 | 6  | AACAAG  | ATTCAG |
| C01G8.5    | chrI:5286384-5286603     | 27.82 | 9  | GTTTTG  | GTACAG |
| ZK520.4    | chrIII:13690949-13691576 | 27.71 | 6  | TATTAG  | TTCCAG |
| ZK675.1    | chrII:7893374-7893537    | 27.64 | 9  | TGTCAG  | TTTCAG |
| T28B4.1    | chrX:6595645-6595833     | 27.48 | 9  | GCTAAG  | TTCCAG |
| C29F9.3    | chrIII:124817-124998     | 27.03 | 5  | CTGAAG  | GTTCAG |
| M88.5      | chrIII:4559481-4559672   | 26.39 | 7  | TAACAG  | TTTCAG |

|           |                          |       |    |        |        |
|-----------|--------------------------|-------|----|--------|--------|
| F53C3.13  | chrII:3926014-3926987    | 26.16 | 6  | CCAAAG | TTTCAG |
| F26H11.2  | chrII:14400607-14400786  | 25.92 | 6  | AAAAAG | TTCCAG |
| Y39A1A.5  | chrIII:10606134-10609976 | 25.27 | 9  | TAAAAG | TTCCAG |
| R01B10.4  | chrV:6047201-6047384     | 24.97 | 8  | TAAAAG | TTACAG |
| C37C3.2   | chrV:7855732-7856115     | 24.83 | 10 | CATTAG | TTCCAG |
| F16A11.3  | chrI:9365077-9365259     | 24.78 | 12 | ACCTAG | TTGCAG |
| R13A5.1   | chrIII:7585595-7586108   | 24.62 | 12 | AGTTAG | TTTCAG |
| F32D1.9   | chrV:4372813-4372979     | 24.47 | 15 | AAATAG | TTTCAG |
| Y73B6BL.6 | chrIV:6325156-6325375    | 24.37 | 9  | TATCAG | TTGCAG |
| C06G3.3   | chrIV:7036111-7036299    | 24.3  | 10 | AAAAAG | TTTCAG |
| C16H3.2   | chrX:17600403-17600595   | 23.96 | 9  | AAAAAG | TTTCAG |
| C35C5.3   | chrX:11546220-11546429   | 23.89 | 9  | AAGTAG | TTTCAG |
| Y69H2.3   | chrV:18660883-18661115   | 23.82 | 15 | TTAAAG | CGCCAG |
| F13G3.7   | chrI:7305002-7305512     | 23.48 | 9  | CATAAG | TTACAG |
| Y42H9AR.3 | chrIV:8104590-8105216    | 23.36 | 6  | TTTGAG | TTCCAG |
| Y53C12B.3 | chrII:9748203-9748437    | 22.95 | 9  | CCTCAG | TTTCAG |
| F28E10.2  | chrIV:4564239-4564596    | 22.75 | 9  | TTTGAG | TTTCAG |
| C08B6.1   | chrV:10102957-10103141   | 22.59 | 12 | TTATAG | TTCAAG |
| C17G10.9  | chrII:5621647-5622465    | 22.23 | 6  | TAACAG | CTTCAG |
| Y102E9.1  | chrIII:6732724-6733288   | 21.83 | 6  | AAAAAG | TTCTAG |
| K02A11.1  | chrI:9742857-9743010     | 21.18 | 12 | TGTAAG | TTCCAG |
| C07G2.2   | chrIII:4492621-4493070   | 21.15 | 9  | ATTTAG | ATTCAG |
| K10B3.9   | chrX:3115501-3116215     | 21.11 | 11 | AGTTAG | TTCCAG |
| Y39B6A.3  | chrV:19189750-19189936   | 21.09 | 6  | AAAAAG | TTTCAG |
| C56G2.6   | chrIII:6338976-6339169   | 20.49 | 12 | AAAAAG | ACTCAG |
| C47B2.6   | chrI:12975174-12975624   | 20.03 | 6  | CTTCAG | TTACAG |
| D1009.1   | chrX:8938432-8938620     | 19.28 | 7  | TCAAAG | TTTCAG |
| C08F1.4   | chrII:1777898-1778082    | 18.8  | 6  | TCGTAG | TTGCAG |
| M02B1.3   | chrIV:12839082-12839976  | 18.51 | 13 | ATTAAG | TTTCAG |
| T14G10.1  | chrIV:10162583-10162764  | 18.23 | 6  | AAAAAG | CTTCAG |
| F37C12.2  | chrIII:7183493-7183669   | 18.14 | 6  | TGATAG | TTTCAG |
| F07H5.3   | chrII:8784828-8785261    | 17.62 | 7  | ATCTAG | TTGCAG |
| F35C5.5   | chrII:12893195-12893381  | 17.52 | 6  | TATCAG | TTCCAG |

L3 worms, N2 vs DG3430[sacy-1(G533R)]

| Gene       | Location (ce10)          | Average $\Delta$ PSI | Splice Site Interval | Proximal Splice Site | Distal Splice Site |
|------------|--------------------------|----------------------|----------------------|----------------------|--------------------|
| F32A6.3    | chrX:5286790-5287117     | 81.47                | 12                   | AAAAAG               | TTCCAG             |
| C26C6.5    | chrI:7539111-7539445     | 75.17                | 9                    | TAAAAG               | TTACAG             |
| Y105C5B.21 | chrIV:15999136-15999878  | 74.08                | 6                    | CCCAAG               | TTTCAG             |
| F21H11.2a  | chrIII:5118386-5118704   | 72.8                 | 9                    | CTGGAG               | TTTTAG             |
| Y57A10A.18 | chrII:12209620-12210895  | 71.95                | 9                    | GATAAG               | CTCCAG             |
| Y39B6A.12  | chrV:19121774-19122072   | 70.96                | 6                    | CAAAAG               | TTCCAG             |
| F46F6.1    | chrX:10374533-10374856   | 69.52                | 6                    | GAATAG               | TTCCAG             |
| B0261.2    | chrI:5260285-5260585     | 69.31                | 12                   | ACTCAG               | CTACAG             |
| C53B4.4    | chrIV:8983488-8983834    | 69.08                | 9                    | TTTGAG               | TTTCAG             |
| C25A1.12   | chrI:10191980-10192307   | 67.77                | 15                   | AATCAG               | CTTCAG             |
| Y92H12A.5  | chrI:1491337-1492534     | 66.49                | 9                    | CGTAAG               | TTTCAG             |
| Y39B6A.43  | chrV:18966682-18967592   | 66.22                | 9                    | CACCAG               | TTCCAG             |
| Y17G7B.2   | chrII:11982044-11983061  | 66.21                | 9                    | CTTAAG               | TTCCAG             |
| ZC376.6    | chrV:14189961-14190282   | 64.68                | 12                   | CAAAAG               | TTCCAG             |
| Y71F9B.10  | chrI:2765533-2765886     | 63.19                | 18                   | AAAAAG               | TTGCAG             |
| Y67D8C.5   | chrIV:3039943-3040642    | 62.54                | 9                    | TTCAAG               | TTCCAG             |
| T27A3.1    | chrI:6125449-6125774     | 62.43                | 6                    | TGTTAG               | TTTCAG             |
| Y73B6BL.6  | chrIV:6325076-6325455    | 61.79                | 9                    | TATCAG               | TTGCAG             |
| T19A6.3    | chrI:8399119-8399319     | 59.53                | 6                    | TCACAG               | TTTCAG             |
| Y41C4A.4   | chrIII:11689572-11691340 | 59.53                | 9                    | CTTTAG               | TTCCAG             |
| F44G4.4    | chrII:8998686-8999026    | 59.21                | 9                    | GAGCAG               | TTGCAG             |
| Y69H2.7    | chrV:18693367-18695647   | 57.73                | 9                    | CAAAAG               | CTCCAG             |
| C28D4.2    | chrIV:9732751-9732996    | 57.09                | 9                    | TCAAAG               | TTCCAG             |
| Y38E10A.6  | chrII:12602074-12603510  | 56.87                | 6                    | AAAAAG               | TTCCAG             |
| Y67H2A.10  | chrIV:13285937-13286287  | 56.45                | 9                    | TTCAAG               | ATTAAG             |
| Y67H2A.6   | chrIV:13302729-13303073  | 55.77                | 15                   | CTTTAG               | TTCCAG             |
| T01D1.2    | chrII:166955-168048      | 55.72                | 9                    | TAAAAG               | TTGCAG             |
| F44B9.7    | chrIII:8027305-8027937   | 55.26                | 9                    | CTGAAG               | ATTCAG             |
| ZK546.1    | chrII:4951468-4951741    | 55.23                | 9                    | GCCTAG               | TTTCAG             |
| T24D11.1   | chrX:16407727-16408071   | 54.92                | 9                    | GATTAG               | TTTCAG             |
| F54C4.3    | chrIII:85018-85912       | 53.76                | 9                    | CTTCAG               | TTCCAG             |
| C03B8.4    | chrIII:7709137-7709462   | 53.55                | 6                    | AGAAAG               | TTTCAG             |
| R107.6     | chrIII:9057997-9058320   | 53.51                | 9                    | TGTCAG               | TTGCAG             |
| R06F6.5    | chrII:10796765-10797026  | 53.44                | 9                    | AAAAAG               | TTACAG             |
| K11E4.5    | chrX:13747785-13748630   | 52.61                | 9                    | TCAAAG               | TTTCAG             |
| H37N21.1   | chrI:7141858-7142205     | 51.98                | 9                    | TTATAG               | TTTCAG             |
| C29E4.4    | chrIII:7931147-7931482   | 51.71                | 6                    | TGAAAG               | TTGCAG             |
| T04D1.4    | chrI:4697044-4697649     | 51.41                | 9                    | TCAAAG               | TTTCAG             |
| K07H8.2    | chrIV:8291700-8292878    | 50.28                | 12                   | ATCCAG               | TTTCAG             |
| F12B6.1    | chrI:2267329-2267754     | 49.6                 | 7                    | GAAAAG               | TTCCAG             |
| F31C3.2    | chrI:15037851-15038197   | 49.26                | 9                    | TTCAAG               | TTTCAG             |
| F52G3.1    | chrX:16966482-16968024   | 48.76                | 9                    | CCCAAG               | TTCCAG             |
| F36H2.3    | chrI:9254307-9255153     | 48.6                 | 9                    | TTATAG               | TTCCAG             |
| Y111B2A.14 | chrIII:12635506-12635763 | 48.08                | 9                    | CTAAAG               | TTCCAG             |

|            |                          |       |    |         |        |
|------------|--------------------------|-------|----|---------|--------|
| Y69A2AR.1  | chrIV:2667126-2667502    | 47.96 | 9  | CTAAAG  | TTGAAG |
| R07G3.3    | chrII:7606034-7606378    | 47.86 | 9  | TAATAG  | TTCCAG |
| Y113G7A.8  | chrV:20082132-20083212   | 47.64 | 9  | TCAAAG  | TTTCAG |
| F39D8.1    | chrX:15409385-15409604   | 47.62 | 9  | TACCAG  | TTAAAG |
| T04C10.2   | chrX:14817407-14817752   | 47.01 | 6  | TTATAG  | CTTCAG |
| C25A1.9    | chrI:10187119-10187401   | 46.93 | 12 | TAAAAG  | TTTCAG |
| C34D10.2   | chrX:8024314-8024651     | 46.92 | 12 | TTTCAG  | CTTCAG |
| F39H11.3   | chrI:8704385-8704685     | 46.63 | 12 | CCCAAG  | TTACAG |
| K06C4.17   | chrV:8900584-8901079     | 46.58 | 8  | TTTAAG  | TTTCAG |
| F32D1.9    | chrV:4372733-4373084     | 46.51 | 15 | AAATAG  | TTTCAG |
| M88.5      | chrIII:4559404-4559752   | 46.13 | 10 | GAACAG  | TTTCAG |
| Y54F10AM.4 | chrIII:2544490-2544895   | 46.12 | 6  | TTCAAG  | TTTCAG |
| Y53C12B.3  | chrII:9748121-9748521    | 45.94 | 9  | CCTCAG  | TTTCAG |
| Y17G7B.18  | chrII:12107320-12107696  | 45.43 | 9  | TCTCAG  | TTGCAG |
| T25D3.4    | chrII:147191-147477      | 45.23 | 7  | AAAAAG  | TTTCAG |
| F36A2.1    | chrI:8807282-8807520     | 45.1  | 12 | CCATAG  | ATGCAG |
| T16G1.9    | chrV:12949014-12949358   | 45.04 | 12 | TTCTAG  | TTACAG |
| T08G5.5    | chrV:14036741-14037087   | 44.97 | 9  | TTTGAG  | TTTCAG |
| T24B8.7    | chrII:9047615-9047962    | 44.94 | 9  | TGAAAG  | TTTCAG |
| C18E9.3    | chrII:8969097-8969358    | 44.93 | 9  | GCAAAG  | CTCTAG |
| R10E8.7    | chrV:18232805-18233141   | 44.83 | 13 | TTGCAG  | TTTAAG |
| K10D2.3    | chrIII:5174926-5175266   | 44.03 | 6  | CAACAG  | TTTCAG |
| F54B3.1    | chrII:10262819-10263165  | 43.81 | 15 | CGCCAG  | TTTCAG |
| C16H3.2    | chrX:17600325-17600621   | 43.76 | 9  | AAAAAG  | TTTCAG |
| C36B1.8    | chrI:8740972-8741338     | 43.71 | 9  | ATAAAG  | TTGCAG |
| Y59A8B.21  | chrV:17988652-17990597   | 43.68 | 9  | TTGTAA  | TTCCAG |
| C44E4.2    | chrI:4631705-4632741     | 43.34 | 9  | CCAAAG  | TTCCAG |
| B0379.3    | chrI:10082997-10083284   | 43.29 | 6  | AATCAG  | TTTCAG |
| M03C11.3   | chrIII:10408120-10408420 | 43.28 | 8  | TATCAG  | TTGAAG |
| C26E6.9    | chrIII:4925647-4926606   | 43.02 | 9  | GAAAAG  | TCTCAG |
| T12A2.8    | chrIII:6247104-6247451   | 42.77 | 9  | AAAAAG  | TTTCAG |
| R07H5.8    | chrIV:11210138-11210464  | 42.27 | 12 | GTGTTG  | TTTCAG |
| C47D12.1   | chrII:11667450-11667791  | 41.91 | 12 | CCTTAG  | TTCCAG |
| T28C6.7    | chrIV:8832537-8832988    | 41.9  | 12 | AAAAAG  | TTTCAG |
| F27C1.2    | chrI:5430574-5430922     | 41.85 | 12 | ACCTAG  | CTTCAG |
| F53G12.5   | chrI:128978-129322       | 41.84 | 9  | G TTCAG | TTCCAG |
| T24A11.1   | chrIII:3799704-3800041   | 41.71 | 12 | AGTCAG  | TTCCAG |
| T08A11.1   | chrIII:4257834-4258158   | 41.4  | 6  | CAATAG  | TTCCAG |
| D2085.5    | chrII:8673555-8673869    | 41.4  | 9  | TTTCAT  | TTACAG |
| F02E9.4    | chrI:8422655-8423000     | 41.07 | 6  | AAATAG  | TTACAG |
| T05H10.5   | chrII:8062672-8062956    | 40.79 | 12 | GATTAG  | TTTCAG |
| T23B12.4   | chrV:8464298-8464682     | 40.58 | 15 | TTTCTG  | TTCCAG |
| Y48G1C.7   | chrI:100184-100538       | 40.53 | 15 | GTGTAG  | TTCCAG |
| M110.4     | chrII:8217140-8217397    | 40.41 | 12 | TTCAAG  | ATTCAG |
| Y59A8B.14  | chrV:18101504-18101823   | 40.06 | 12 | TTTTTG  | TTTCAG |
| F56C9.10   | chrIII:7333212-7333690   | 40.03 | 9  | ATTGAG  | GTGAAG |
| Y111B2A.22 | chrIII:12741802-12743551 | 39.82 | 9  | TCCAAG  | TTCCAG |

|            |                          |       |    |         |        |
|------------|--------------------------|-------|----|---------|--------|
| F13H10.4   | chrIV:11018455-11018782  | 39.58 | 9  | TGTGTAG | TTTCAG |
| F54B3.1    | chrII:10261983-10262966  | 39.15 | 6  | AACTAG  | CTTCAG |
| Y48C3A.12  | chrII:13387349-13388555  | 39.12 | 11 | GTGAAG  | TTCCAG |
| F11A10.4   | chrIV:12103477-12104719  | 39.05 | 9  | TTTTCG  | TTCTAG |
| C04D8.1    | chrIII:8496022-8497126   | 38.92 | 9  | TAATAG  | TTTCAG |
| Y48A6B.11  | chrIII:11064311-11065115 | 38.86 | 9  | CCAAAG  | TTACAG |
| K07C5.8    | chrV:10363007-10363276   | 38.56 | 9  | TCTAAG  | TTACAG |
| F39H11.2   | chrI:8701327-8701633     | 38.45 | 9  | CAAAAG  | TTGCAG |
| W06A7.3    | chrV:14829949-14830298   | 38.43 | 12 | AATGAG  | TTTCAG |
| F56B6.2    | chrX:3547601-3547906     | 38.33 | 9  | CATAAG  | CTTCAG |
| R10E9.1    | chrIII:3965711-3966490   | 37.99 | 9  | CTCAAG  | TTTCAG |
| Y73F8A.24  | chrIV:15449062-15449379  | 37.69 | 12 | CCCTAG  | TTGCAG |
| C44H4.7    | chrX:14603789-14604095   | 37.25 | 6  | ATAAAG  | TTTCAG |
| F39B3.2    | chrX:17568941-17569212   | 37.07 | 9  | TATCAG  | TTCCAG |
| T05F1.1    | chrI:9621316-9621646     | 36.51 | 9  | CGTAAG  | TTTCAG |
| Y34B4A.8   | chrX:5272498-5273061     | 36.49 | 9  | CATAAG  | TTTCAG |
| F58A4.7    | chrIII:9619672-9622175   | 36.37 | 9  | GTAAAG  | TTTCAG |
| F39H11.2   | chrI:8701709-8702026     | 36.06 | 9  | CGAAAG  | TTACAG |
| D2089.4    | chrII:10678697-10679007  | 35.91 | 9  | TCATAG  | TTGAAG |
| F38A6.3    | chrV:20783888-20784257   | 35.85 | 6  | TATCAG  | TTGCAG |
| Y105E8A.24 | chrI:14571620-14572853   | 35.77 | 9  | TTAAAG  | TTTCAG |
| F54E7.3    | chrIII:5672505-5673229   | 35.76 | 9  | GATTAG  | TTTCAG |
| K02F2.1    | chrI:6838813-6839150     | 35.69 | 12 | GTTGAG  | TTGCAG |
| B0285.1    | chrIII:4333416-4334245   | 35.56 | 6  | AGCTAG  | TTTCAG |
| F10C2.5    | chrV:12045699-12046045   | 35.42 | 11 | CATAAG  | TTCCAG |
| ZK675.1    | chrII:7893340-7893629    | 35.23 | 9  | TGTCAG  | TTTCAG |
| Y40B1A.3   | chrI:13353088-13354204   | 35.15 | 9  | TGAAAG  | TTACAG |
| B0513.1    | chrIV:13890372-13890795  | 34.74 | 9  | CTTCAG  | TTTCAG |
| H14E04.2   | chrIII:2376317-2376645   | 34.18 | 9  | TCCCAG  | TTTCAG |
| K10D2.3    | chrIII:5175284-5175739   | 34.07 | 9  | GTCAAG  | TTTCAG |
| Y32H12A.8  | chrIII:5404652-5404998   | 33.51 | 12 | CGCCAG  | TTCAAG |
| H20J04.3   | chrII:4336134-4337163    | 33.47 | 9  | TCTTAG  | CTTCAG |
| B0261.2    | chrI:5258608-5259454     | 33.46 | 9  | GTCAAG  | TTATAG |
| T05C12.6   | chrII:8182430-8182883    | 33.16 | 13 | AATTAG  | TTCCAG |
| B0336.5    | chrIII:5693026-5693363   | 32.94 | 9  | TCCCAG  | TTGCAG |
| D1046.1    | chrIV:8926311-8926536    | 32.57 | 6  | TTTTTG  | ATCCAG |
| R13A5.1    | chrIII:7585517-7586186   | 32.42 | 12 | AGTTAG  | TTTCAG |
| F58A4.7    | chrIII:9623548-9623897   | 32.2  | 6  | GTATAG  | ATCCAG |
| C24A8.3    | chrX:4304457-4304735     | 32.14 | 9  | AAATAG  | TTCCAG |
| Y119C1B.8  | chrI:4528990-4530018     | 32.13 | 6  | ACCCAG  | TTTCAG |
| Y92H12A.1  | chrI:1567550-1570497     | 31.98 | 12 | AAAAAG  | ACGCAG |
| C34D4.14   | chrIV:7140904-7141215    | 31.94 | 6  | GTCTAG  | ATTCAG |
| C53A5.6    | chrV:14545310-14545652   | 31.34 | 9  | AAAAAG  | TTGCAG |
| Y113G7A.6  | chrV:20059612-20061476   | 31.31 | 9  | ATACAG  | TTTCAG |
| F15A8.5    | chrX:4411561-4411903     | 31.2  | 9  | ATTTAG  | GTCAAG |
| R13H8.1    | chrI:10763550-10764490   | 30.72 | 6  | CGAAAG  | TTTCAG |
| T22H6.2    | chrX:12782452-12783474   | 30.3  | 6  | TAATAG  | TTACAG |

|            |                         |       |    |        |        |
|------------|-------------------------|-------|----|--------|--------|
| F23H11.2   | chrIII:897066-897531    | 30.29 | 40 | TTCCAG | CTTCAG |
| F20H11.2   | chrIII:6597793-6598234  | 30.18 | 12 | TGGTAG | TTTCAG |
| R02F2.1    | chrIII:5505017-5505361  | 30.08 | 6  | CTCAAG | TTTCAG |
| C09H10.10  | chrII:11095299-11095639 | 30.05 | 9  | CTCCAG | TTTCAG |
| T13F2.3    | chrIV:9796116-9796369   | 29.92 | 6  | TGTCAG | ATTCAG |
| C05D10.4   | chrIII:6089150-6089469  | 29.83 | 9  | AAAAAG | CTTCAG |
| K05B2.2    | chrX:4911160-4911462    | 29.76 | 9  | TTGAAG | TTTCAG |
| C53B4.4    | chrIV:8981197-8981832   | 29.47 | 6  | GATTAG | TTTCAG |
| ZK858.4    | chrI:9134281-9135105    | 29.42 | 12 | TTTGAG | TTACAG |
| C05E11.1   | chrX:4589773-4590093    | 29.26 | 12 | TTGTAG | TTTCAG |
| W05F2.7    | chrI:3355095-3355410    | 29.14 | 11 | CCCCAG | TTTTAG |
| Y113G7B.18 | chrV:20254839-20256422  | 29.12 | 9  | TTCCAG | TTCCAG |
| H05C05.1   | chrIII:2957333-2958371  | 28.72 | 6  | GCCTAG | TTCCAG |
| C34D10.2   | chrX:8021188-8022864    | 28.68 | 6  | AATTAG | TTGCAG |
| C10C5.6    | chrIV:9391064-9391414   | 28.67 | 18 | TAAAAG | TTCCAG |
| Y57G11C.33 | chrIV:14657042-14657309 | 28.61 | 12 | GGTTAG | GGTCAG |
| F28E10.2   | chrIV:4564243-4564673   | 28.61 | 9  | TTTGAG | TTTCAG |
| F26H9.2    | chrI:9293414-9293794    | 28.01 | 9  | CGATAG | TTTCAG |
| F45F2.10   | chrV:8514701-8515004    | 27.95 | 9  | TTTTAG | ATTTAG |
| C05C10.2   | chrII:9930126-9930535   | 27.94 | 6  | TAATAG | TTTCAG |
| F41H10.3   | chrIV:5372413-5372824   | 27.8  | 12 | TCCCAG | TTTCAG |
| T27B1.2    | chrX:16537721-16538066  | 27.74 | 6  | TCTTAG | TTTCAG |
| C53B4.4    | chrIV:8983687-8984086   | 27.61 | 7  | TAAAAG | CTCCAG |
| C39E9.14   | chrIV:13097654-13097996 | 27.53 | 6  | CAAAAG | TTTTAG |
| Y66H1B.2   | chrIV:363769-364318     | 27.09 | 6  | ATCCAG | TTCCAG |
| F58H1.7    | chrV:11964241-11964826  | 26.83 | 6  | TCCCAG | TTCCAG |
| F33D4.2    | chrIV:7692118-7692434   | 26.69 | 9  | ATTAAG | TTTCAG |
| Y61A9LA.8  | chrV:4562830-4564498    | 26.37 | 6  | TGACAG | TTTCAG |
| Y106G6E.6  | chrI:10230269-10230620  | 26.36 | 15 | CATCAG | TTACAG |
| T08A11.1   | chrIII:4250831-4251441  | 26.22 | 6  | AATAAG | GTTCAG |
| F40A3.2    | chrV:7880979-7881340    | 25.78 | 27 | TTTTAG | ATCCAG |
| E01G4.4    | chrII:13454791-13455084 | 25.51 | 9  | TCGAAG | TTTCAG |
| C09H6.1    | chrI:8108107-8108874    | 25.45 | 6  | CAATAG | TTTCAG |
| M03F8.3    | chrV:5941086-5941724    | 25.37 | 9  | CGCTAG | TTTCAG |
| ZK1127.3   | chrII:7055697-7056031   | 25.34 | 7  | TCATAG | TTTCAG |
| R119.5     | chrI:391667-392196      | 25.31 | 3  | TCCCAG | CAGCAG |
| C50C3.7    | chrIII:8160297-8160594  | 24.86 | 7  | TCACAG | TTCCAG |
| ZK1193.5   | chrX:427854-428687      | 24.81 | 9  | TTTTAG | TTTCAG |
| F55A12.5   | chrI:5347139-5347468    | 24.6  | 9  | CCGAAG | TTCCAG |
| Y45F10D.13 | chrIV:13769005-13769416 | 24.46 | 6  | TTGAAG | TTCCAG |
| C46C2.1    | chrIV:9210514-9211381   | 23.84 | 7  | CATCAG | TTCCAG |
| Y113G7B.23 | chrV:20239830-20241375  | 23.71 | 9  | AAAAAG | TTTCAG |
| H15N14.1   | chrI:7774890-7775224    | 23.7  | 9  | TATTAG | CTTCAG |
| C17G10.9   | chrII:5621638-5622498   | 23.67 | 6  | TAACAG | CTTCAG |
| Y110A2AL.8 | chrII:2848163-2848502   | 23.65 | 9  | ATATAG | ACGCAG |
| K02C4.3    | chrII:8082239-8082837   | 23.63 | 9  | TTCAAG | TTCCAG |
| M88.5      | chrIII:4554179-4554681  | 23.47 | 12 | GGGAG  | TTGCAG |

|           |                          |       |    |         |        |
|-----------|--------------------------|-------|----|---------|--------|
| R11A8.7   | chrIV:10378445-10378794  | 23.16 | 12 | AATTAG  | TTACAG |
| F39B1.1   | chrX:15241591-15241910   | 23.12 | 6  | TGAAAG  | TTTAAG |
| B0261.2   | chrI:5252806-5253343     | 23.02 | 6  | AAAAAG  | TTTCAG |
| T05F1.1   | chrI:9621129-9621457     | 22.93 | 9  | TTGAAG  | TTTCAG |
| C07G2.2   | chrIII:4492619-4492925   | 22.9  | 9  | AATTAG  | ATTCAG |
| T27F2.2   | chrV:11632303-11632835   | 22.84 | 6  | AAATAG  | ATTCAG |
| C18H9.3   | chrII:6684193-6684789    | 22.72 | 9  | TTAAAG  | TTTCAG |
| F26B1.2   | chrI:6319198-6319599     | 21.85 | 9  | ATGAAG  | TTTCAG |
| F40F12.7  | chrIII:9914491-9914827   | 21.77 | 9  | CACCAG  | TTTCAG |
| C17G10.9  | chrII:5620914-5621257    | 21.54 | 9  | CTACAG  | TTCCAG |
| C05G5.2   | chrX:14749746-14750091   | 21.21 | 7  | TACTAG  | TTTCAG |
| Y119C1B.8 | chrI:4529867-4530207     | 21.16 | 6  | ATCTAG  | CTTCAG |
| F07H5.3   | chrII:8784847-8785235    | 20.89 | 7  | ATCTAG  | TTGCAG |
| C12C8.3   | chrI:9338650-9338970     | 20.86 | 12 | TTTCAG  | TTTCAG |
| F22G12.5  | chrI:13167409-13168463   | 20.79 | 6  | GACCAG  | TTCCAG |
| F59F4.3   | chrX:15843961-15844302   | 20.78 | 12 | TCATAG  | TTGCAG |
| T01B10.4  | chrX:8474109-8474455     | 20.25 | 8  | ATTTAG  | TAACAG |
| C02E11.1  | chrV:1048263-1048592     | 19.74 | 6  | CAAAAG  | CTTCAG |
| T05A10.1  | chrX:10780890-10781236   | 19.54 | 3  | CGTTAG  | TAGCAG |
| C24F3.1   | chrIV:10220433-10220764  | 19.13 | 6  | ACCTAG  | TTTCAG |
| F26C11.1  | chrII:9896147-9896431    | 18.8  | 9  | TTTTTG  | ATCCAG |
| C01G8.9   | chrI:5302504-5302814     | 17.79 | 10 | GTCAAG  | TTCCAG |
| F44A6.1   | chrX:10199397-10199788   | 17.6  | 6  | CAACAAG | CTTCAG |
| Y41C4A.4  | chrIII:11685059-11688178 | 16.77 | 6  | TCTCAG  | TTTCAG |
| F29C12.1  | chrII:13108176-13108511  | 16.65 | 6  | ATTTAG  | GTTCAG |

L3 worms, N2 vs SZ454[mog-5( $\Delta$ 17 + 9)]

| Gene       | Location (ce10)          | Average $\Delta$ PSI | Splice Site Interval | Proximal Splice Site | Distal Splice Site |
|------------|--------------------------|----------------------|----------------------|----------------------|--------------------|
| F32A6.3    | chrX:5286790-5287117     | 56.79                | 12                   | AAAAAG               | TTCCAG             |
| C26C6.5    | chrI:7539111-7539445     | 46.26                | 9                    | TAAAAG               | TTACAG             |
| C15A11.3   | chrI:7390516-7391998     | 44.47                | 15                   | CAACAG               | CTACAG             |
| Y71F9B.10  | chrI:2765533-2765886     | 43.86                | 18                   | AAAAAG               | TTGCAG             |
| Y41C4A.4   | chrIII:11688090-11691347 | 43.54                | 9                    | CTTTAG               | TTCCAG             |
| Y105C5B.21 | chrV:15999136-15999878   | 43.53                | 6                    | CCCAAG               | TTTCAG             |
| T27A3.1    | chrI:6125449-6125774     | 42.37                | 6                    | TGTTAG               | TTTCAG             |
| H37N21.1   | chrI:7141858-7142205     | 41.42                | 9                    | TTATAG               | TTTCAG             |
| VF11C1L.1  | chrX:12975319-12975641   | 39.35                | 9                    | TGATAG               | CTTCAG             |
| C34D10.2   | chrX:8024314-8024651     | 38.25                | 12                   | TTTCAG               | CTTCAG             |
| T02C5.1    | chrX:2697846-2698126     | 38.19                | 16                   | CATAAG               | CTTCAG             |
| Y57A10A.18 | chrII:12209620-12210895  | 37.79                | 9                    | GATAAG               | CTCCAG             |
| M110.4     | chrII:8217140-8217397    | 37.48                | 12                   | TTCAAG               | ATTCAG             |
| M04B2.5    | chrV:11505031-11505631   | 36.44                | 8                    | CAACAG               | TTCCAG             |
| T04C10.2   | chrX:14817407-14817752   | 35.57                | 6                    | TTATAG               | CTTCAG             |
| C29E4.4    | chrIII:7928972-7929227   | 33.25                | 15                   | ATTTAG               | CTTCAG             |
| F46F6.1    | chrX:10374533-10374856   | 32.92                | 6                    | GAATAG               | TTCCAG             |
| ZC376.6    | chrV:14189961-14190282   | 32.78                | 12                   | CAAAAG               | TTCCAG             |
| C31H1.8    | chrV:5813470-5813775     | 31.16                | 6                    | CCAAG                | TTTCAG             |
| D1009.3    | chrX:8908103-8908760     | 31.11                | 6                    | TTCTAG               | TTTCAG             |
| Y54F10AM.4 | chrIII:2544490-2544895   | 31.1                 | 6                    | TTCAAG               | TTTCAG             |
| Y113G7A.8  | chrV:20082132-20083212   | 30.63                | 9                    | TCAAAG               | TTTCAG             |
| T24D11.1   | chrX:16407727-16408071   | 30.56                | 9                    | GATTAG               | TTTCAG             |
| F44G4.4    | chrII:8998686-8999026    | 29.46                | 9                    | GAGCAG               | TTGCAG             |
| T04D1.4    | chrI:4697044-4697649     | 29.19                | 9                    | TCAAAG               | TTTCAG             |
| T19E10.1   | chrII:10778888-10779553  | 29.14                | 9                    | TGTTAG               | TTTCAG             |
| T19A6.3    | chrI:8399119-8399319     | 28.88                | 6                    | TCACAG               | TTTCAG             |
| Y57G11C.33 | chrV:14657042-14657309   | 28.77                | 12                   | GGTTAG               | GGTCAG             |
| C28D4.2    | chrV:9732751-9732996     | 28.54                | 9                    | TCAAAG               | TTCCAG             |
| Y73B6BL.6  | chrV:6325076-6325455     | 28.27                | 9                    | TATCAG               | TTGCAG             |
| Y37A1C.1   | chrV:14115393-14115669   | 28.2                 | 6                    | TCCAAG               | TTTCAG             |
| F58H1.7    | chrV:11964241-11964826   | 28.13                | 6                    | TCCCAG               | TTCCAG             |
| Y92H12A.5  | chrI:1491337-1492534     | 28.09                | 9                    | CGTAAG               | TTTCAG             |
| C34D10.2   | chrX:8021188-8022864     | 28.05                | 6                    | AATTAG               | TTGCAG             |
| Y69A2AR.1  | chrV:2667126-2667502     | 27.97                | 9                    | CTAAAG               | TTGAAG             |
| F21D12.1   | chrII:7348084-7348404    | 27.86                | 6                    | TTAAAG               | TTATAG             |
| F32D1.9    | chrV:4372733-4373084     | 27.83                | 15                   | AAATAG               | TTTCAG             |
| C03B8.4    | chrIII:7709137-7709462   | 27.77                | 6                    | AGAAAG               | TTTCAG             |
| C06A6.2    | chrV:7852863-7853211     | 26.76                | 9                    | CTCTAG               | ATTCAG             |
| C36B1.8    | chrI:8740972-8741338     | 26.49                | 9                    | ATAAAG               | TTGCAG             |
| Y48C3A.12  | chrII:13387349-13388555  | 26.34                | 11                   | GAAGAG               | TTCCAG             |
| C25A1.12   | chrI:10191980-10192307   | 26                   | 15                   | AATCAG               | CTTCAG             |
| T08G5.5    | chrV:14036741-14037087   | 25.76                | 9                    | TTTGAG               | TTTCAG             |
| Y39B6A.12  | chrV:19121774-19122072   | 25.64                | 6                    | CAAAAG               | TTCCAG             |

|           |                          |       |    |        |        |
|-----------|--------------------------|-------|----|--------|--------|
| T10B11.8  | chrI:6953779-6954226     | 25.29 | 6  | CTAAAG | TTTCAG |
| C18E9.3   | chrII:8969097-8969358    | 25.27 | 9  | GCAAAG | CTCTAG |
| C27C12.4  | chrX:14854908-14855643   | 25.07 | 6  | TTTCAG | TTTCAG |
| T26A5.2   | chrIII:6469907-6470192   | 24.9  | 9  | GGAAAG | TTTCAG |
| Y67D8C.5  | chrIV:3039943-3040642    | 24.42 | 9  | TTCAAG | TTCCAG |
| F39B3.2   | chrX:17568941-17569212   | 24.31 | 9  | TATCAG | TTCCAG |
| Y54G2A.28 | chrIV:3006026-3006229    | 24.14 | 7  | AAAAAG | TTCCAG |
| F02E9.4   | chrI:8422655-8423000     | 24.08 | 6  | AAATAG | TTACAG |
| B0261.2   | chrI:5260285-5260585     | 23.7  | 12 | ACTCAG | CTACAG |
| T13C2.2   | chrII:6792808-6793095    | 23.61 | 12 | TCCCAG | ATTCAG |
| R10E8.7   | chrV:18232805-18233141   | 23.51 | 13 | TTGCAG | TTTAAG |
| C27H5.3   | chrII:7152863-7153236    | 23.3  | 3  | TTTCAG | CAGCAG |
| F31C3.2   | chrI:15037851-15038197   | 22.84 | 9  | TTCAAG | TTTCAG |
| C04D8.1   | chrIII:8496022-8497126   | 22.78 | 9  | TAATAG | TTTCAG |
| R107.5    | chrIII:9052153-9052488   | 22.71 | 6  | TATAAG | TTGCAG |
| R10E9.1   | chrIII:3965711-3966490   | 22.18 | 9  | CTCAAG | TTTCAG |
| ZK1193.5  | chrX:427854-428687       | 22.02 | 9  | TTTTAG | TTTCAG |
| C08C3.2   | chrIII:7775648-7775969   | 21.99 | 6  | CTTTAG | TTTCAG |
| F45F2.10  | chrV:8514701-8515004     | 21.89 | 9  | TTTTAG | ATTTAG |
| C09B8.7   | chrX:6047191-6047540     | 21.84 | 9  | CTACAG | TTATAG |
| F21H11.2a | chrIII:5118386-5118704   | 21.56 | 9  | CTGGAG | TTTTAG |
| ZK858.4   | chrI:9134281-9135105     | 21.4  | 12 | TTTGAG | TTACAG |
| M03C11.3  | chrIII:10408120-10408420 | 21.22 | 8  | TATCAG | TTGAAG |
| F01D4.5   | chrIV:10482633-10482975  | 21.16 | 10 | TATCAG | TTACAG |
| C24A8.3   | chrX:4304457-4304735     | 20.55 | 9  | AAATAG | TTCCAG |
| K10D2.3   | chrIII:5174926-5175266   | 20.53 | 6  | CAACAG | TTTCAG |
| F15A8.5   | chrX:4411561-4411903     | 19.77 | 9  | ATTTAG | GTCAAG |
| R11A8.7   | chrIV:10378445-10378794  | 19.21 | 12 | AATTAG | TTACAG |
| F32A5.2   | chrII:7246384-7247440    | 18.47 | 6  | ATCCAG | TTCCAG |
| C01B7.1   | chrV:8787889-8788324     | 17.88 | 6  | TGTTAG | TTGCAG |
| F39B1.1   | chrX:15241591-15241910   | 17.81 | 6  | TGAAAG | TTTAAG |
| T22H6.2   | chrX:12782452-12783474   | 17.04 | 6  | TAATAG | TTACAG |

## Supplemental Table 2

| <b>crRNA guide name</b>                                                   | <b>crRNA guide sequence</b> (entered as DNA into IDTdna.com crRNA order form)                              |
|---------------------------------------------------------------------------|------------------------------------------------------------------------------------------------------------|
| mog5-inter-crRNA                                                          | GCTGGTGAAAAGCGACTTA                                                                                        |
| <b>CRISPR repair name and description</b>                                 | <b>CRISPR repair oligonucleotides sequence</b> (lower case differs from wt)                                |
| mog5-522G544repair                                                        | ATGAAAGAAATGCCAGAATGGTTGAAACATGTGACA<br>GCaGGTGGAgggGCGggaTATGGAAGAAGAACCAAT<br>TTGAGTATGGTTGAGCAGAGAGAAAG |
| Removes PVUll cute site, creates K522G and T524G amino acid substitutions |                                                                                                            |

### Supplemental Table 3

icd-2SSFor = AGAAGCCAAGATCGAGGATC  
icd-2SSRev = TTGTCAGCTTCCTTAAGCGC  
Genomic DNA Product = 271 nt  
Upstream AG usage = 228 nt  
Downstream AG usage = 222 nt

Imd-1SSFor = AGGTAGCCGAAATAAAACGAG  
Imd-1SSRev = ATATCCTCGACACTGGGATC  
Genomic DNA Product = 266 nt  
Upstream AG usage = 225 nt  
Downstream AG usage = 217 nt

sax-2For = GGAAGCAATCGAAATGCGTC  
sax-2Rev = TTCTCACTCTGCAACTGCTC  
Genomic DNA Product = 277 nt  
Upstream AG usage = 231 nt  
Downstream AG usage = 222 nt

dcp-66For = ATTCAGACCATATGCCGGAC  
dcp-66Rev = TTTGCTTCTGCGTACTGCTC  
Genomic DNA Product = 310 nt  
Upstream AG usage = 267 nt  
Downstream AG usage = 258 nt

jac-1For = GGTTACCCGAGGACTTTGTC  
jac-1Rev = CCGCTGAGCTTCTAACAATC  
Genomic DNA Product = 668 nt  
Upstream AG usage = 219 nt  
Downstream AG usage = 213 nt
